# Supplementary material
Source: publisher figshare collection journal article supplement (https://frontiersin.figshare.com/ndownloader/files/21746940)

## *Supplementary Material*

**Supplemental Table 1.** Suite of sensors operated by the NOAA Ship *Okeanos Explorer* during CAPSTONE.

| Sensor                             | Description                                                                           | Data collection                                      |
|------------------------------------|---------------------------------------------------------------------------------------|------------------------------------------------------|
| Multibeam Echo Sounder             | EM 302 (30 kHz)                                                                       | Continuously except during ROV dives                 |
| Single beam fisheries echo sounder | EK60: 18 kHz, 38 kHz, 70 kHz, 200 kHz, 333 kHz                                        | Concurrent with EM302 operations<br>During ROV dives |
| Sub-bottom profiler                | 3.5 kHz Sub-bottom profiler                                                           | Concurrent with EM302 operations                     |
| Oceanographic profilers            | CTD: SeaBird SBE 911 / XBTs                                                           | XBTs every 3-6 hours during mapping operations       |
| Meteorological sensors             | Wind, air temperature, humidity, SST, surface salinity, PAR                           | Continuously during all operations                   |
| ROV / Camera Sled video            | 2 Insite Pacific Zeus Plus HD cameras (details)                                       | During ROV dives                                     |
| ROV environmental sensors          | CTD: SeaBird SBE19<br>Dissolved Oxygen:<br>ORP sensor:<br>Temperature probe           | During ROV dives                                     |
| ROV video metadata                 | Real time Event log<br>Real time Seascribe annotations<br>Video annotations post dive | During ROV dives                                     |

**Supplementary Table 2.** CAPSTONE ROV dive effort shown by region, feature, and depth, showing effort by number of total annotations, number of dives, hours of bottom time, and seafloor imaged. Percent unidentifiable taxa by number of annotations at each taxonomic level depicted.

|                          | # annotations | # of dives | bottom time<br>(# hours) | Estimated Seafloor<br>imaged (Km) | #unidentifiable at<br>Species level | #unidentifiable at<br>Genus level | #unidentifiable<br>at Family level |
|--------------------------|---------------|------------|--------------------------|-----------------------------------|-------------------------------------|-----------------------------------|------------------------------------|
| Total                    | 90,079        | 168        | 891.48                   | 29.386225                         | 71,182                              | 34765                             | 11531                              |
| Geographic Region:       |               |            |                          |                                   |                                     |                                   |                                    |
| Hawaiian Islands         | 53,575        | 74         | 391.4                    | 13.682625                         | 41,385                              | 19,409                            | 4,953                              |
| Marianas                 | 13,073        | 40         | 216.4                    | 7.69395                           | 10,776                              | 5,611                             | 2,467                              |
| Western Pacific Plate    | 5,785         | 12         | 62                       | 2.04875                           | 4,702                               | 1,780                             | 585                                |
| American Samoa           | 2,443         | 13         | 64.9                     | 1.5015                            | 1,948                               | 840                               | 434                                |
| Southern Central Pacific | 15,200        | 29         | 156.7                    | 4.01775                           | 12,371                              | 7,116                             | 3,092                              |
| Geologic Feature:        |               |            |                          |                                   |                                     |                                   |                                    |
| Island                   | 7,606         | 16         | 92.9                     | 3.21695                           | 5,791                               | 3,168                             | 1,580                              |
| Atoll                    | 5,045         | 13         | 69.4                     | 2.011625                          | 3,772                               | 1,648                             | 782                                |
| Bank                     | 17,190        | 18         | 107.1                    | 3.78565                           | 13,556                              | 6,415                             | 1,853                              |
| Guyot                    | 27,466        | 48         | 157.7                    | 8.001675                          | 22,129                              | 10,273                            | 2,890                              |
| Conical Seamount         | 17,001        | 31         | 163.2                    | 5.0952                            | 13,457                              | 6,516                             | 1,692                              |
| Ridge Seamount           | 12,981        | 21         | 108.1                    | 3.511475                          | 10,239                              | 5,548                             | 2,069                              |
| Inactive vent            | 582           | 4          | 21.8                     | 0.86075                           | 539                                 | 340                               | 130                                |
| Vent                     | 1,482         | 7          | 46.4                     | 1.19075                           | 1,053                               | 524                               | 341                                |
| Abyssal                  | 705           | 10         | 39.8                     | 1.2705                            | 628                                 | 310                               | 182                                |
| Depth:                   |               |            |                          |                                   |                                     |                                   |                                    |
| 0-250                    | 359           | 14         | 5.7                      | 0.15675                           | 311                                 | 181                               | 153                                |
| 250-500                  | 12,371        | 32         | 149.5                    | 4.62                              | 9,300                               | 4,884                             | 2,218                              |
| 500-750                  | 4,447         | 27         | 57.3                     | 1.5785                            | 3,187                               | 1,507                             | 859                                |
| 750-1000                 | 3,762         | 18         | 38.1                     | 1.08625                           | 2,624                               | 1,698                             | 903                                |
| 1000-1500                | 10,654        | 33         | 112.1                    | 3.465                             | 8,422                               | 4,481                             | 1541                               |
| 1500-2000                | 26,482        | 53         | 179                      | 5.918                             | 20,990                              | 9,476                             | 2,470                              |
| 2000-2500                | 6,451         | 56         | 213.1                    | 6.400625                          | 5,579                               | 2,157                             | 326                                |
| 2500-3000                | 3,248         | 22         | 68.6                     | 2.2165                            | 2,799                               | 1,444                             | 539                                |
| 3000-3500                | 940           | 11         | 33.5                     | 1.14675                           | 799                                 | 396                               | 145                                |
| 3500-4000                | 1,082         | 10         | 34.3                     | 1.122                             | 954                                 | 455                               | 154                                |
| 4000-4500                | 476           | 6          | 22.8                     | 0.8525                            | 429                                 | 197                               | 119                                |
| 4500-5000                | 332           | 5          | 18.8                     | 0.39875                           | 280                                 | 169                               | 107                                |
| 5000-5500                | 0             | 1          | 0.4                      | 0.011                             | 0                                   | 0                                 | 0                                  |
| 5500-6000                | 172           | 4          | 14.9                     | 0.4345                            | 154                                 | 95                                | 52                                 |

**Supplemental Table 3.** CAPSTONE ROV dive effort shown by region and feature, categorized by each depth bin, showing effort by time (number of hours).

| REGION                | Time in Depth (hours) |         |         |          |           |           |           |           |           |           |           |           |           |           |
|-----------------------|-----------------------|---------|---------|----------|-----------|-----------|-----------|-----------|-----------|-----------|-----------|-----------|-----------|-----------|
|                       | 0-250                 | 250-500 | 500-750 | 750-1000 | 1000-1500 | 1500-2000 | 2000-2500 | 2500-3000 | 3000-3500 | 3500-4000 | 4000-4500 | 4500-5000 | 5000-5500 | 5500-6000 |
| HAWAII                | 0                     | 31      | 7       | 8        | 50        | 108       | 136       | 41        | 13        | 10        | 8         | 3         | 0         | 0         |
| MARIANAS              | 5                     | 75      | 16      | 7        | 7         | 17        | 17        | 13        | 15        | 18        | 13        | 13        | 0         | 11        |
| WESTERN PACIFIC       | 0                     | 4       | 4       | 5        | 17        | 12        | 18        | 6         | 3         | 0         | 0         | 0         | 0         | 0         |
| AMERICAN SAMOA        | 0                     | 18      | 13      | 4        | 5         | 2         | 13        | 8         | 3         | 7         | 0         | 0         | 0         | 0         |
| SOUTH CENTRAL PACIFIC | 0                     | 21      | 17      | 14       | 34        | 40        | 30        | 0         | 0         | 0         | 2         | 3         | 0         | 4         |
| FEATURE               |                       |         |         |          |           |           |           |           |           |           |           |           |           |           |
| ISLAND                | 0                     | 59      | 17      | 3        | 1         | 6         | 10        | 0         | 0         | 0         | 2         | 0         | 0         | 0         |
| ATOLL                 | 0                     | 22      | 11      | 8        | 17        | 2         | 8         | 7         | 0         | 0         | 0         | 0         | 0         | 0         |
| BANK                  | 0                     | 27      | 11      | 1        | 11        | 34        | 21        | 5         | 2         | 0         | 0         | 3         | 0         | 0         |
| GUYOT                 | 0                     | 0       | 0       | 5        | 41        | 88        | 91        | 20        | 7         | 0         | 0         | 0         | 0         | 0         |
| CONICAL SEAMOUNT      | 0                     | 16      | 3       | 3        | 28        | 39        | 34        | 12        | 7         | 26        | 0         | 0         | 0         | 0         |
| RIDGE SEAMOUNT        | 0                     | 8       | 8       | 10       | 7         | 10        | 44        | 13        | 10        | 0         | 2         | 3         | 0         | 0         |
| INACTIVE VENT         | 0                     | 0       | 0       | 0        | 0         | 0         | 6         | 12        | 0         | 6         | 0         | 0         | 0         | 0         |
| VENT                  | 5                     | 18      | 8       | 9        | 7         | 0         | 0         | 0         | 7         | 2         | 4         | 0         | 0         | 0         |
| ABYSSAL               | 0                     | 0       | 0       | 0        | 0         | 0         | 0         | 0         | 0         | 0         | 14        | 13        | 0         | 15        |

**Supplemental Table 4:** CAPSTONE ROV dive effort shown by region and feature, categorized by each depth bin, showing effort by number of ROV dives.

| REGION                | Number of Dives |         |         |          |           |           |           |           |           |           |           |           |           |           |
|-----------------------|-----------------|---------|---------|----------|-----------|-----------|-----------|-----------|-----------|-----------|-----------|-----------|-----------|-----------|
|                       | 0-250           | 250-500 | 500-750 | 750-1000 | 1000-1500 | 1500-2000 | 2000-2500 | 2500-3000 | 3000-3500 | 3500-4000 | 4000-4500 | 4500-5000 | 5000-5500 | 5500-6000 |
| HAWAII                | 0               | 6       | 6       | 5        | 18        | 30        | 34        | 12        | 4         | 2         | 2         | 1         | 0         | 0         |
| MARIANAS              | 7               | 13      | 7       | 1        | 1         | 5         | 6         | 3         | 3         | 5         | 3         | 3         | 1         | 3         |
| WESTERN PACIFIC       | 0               | 2       | 3       | 2        | 4         | 5         | 5         | 2         | 1         | 0         | 0         | 0         | 0         | 0         |
| AMERICAN SAMOA        | 0               | 4       | 4       | 2        | 1         | 1         | 3         | 3         | 2         | 2         | 0         | 0         | 0         | 0         |
| SOUTH CENTRAL PACIFIC | 0               | 6       | 6       | 6        | 9         | 10        | 8         | 0         | 0         | 0         | 1         | 1         | 0         | 1         |
| FEATURE               |                 |         |         |          |           |           |           |           |           |           |           |           |           |           |
| ISLAND                | 1               | 12      | 8       | 1        | 1         | 1         | 2         | 0         | 0         | 0         | 1         | 0         | 0         | 0         |
| ATOLL                 | 0               | 5       | 4       | 3        | 5         | 1         | 2         | 2         | 0         | 0         | 0         | 0         | 0         | 0         |
| BANK                  | 1               | 5       | 5       | 1        | 3         | 9         | 5         | 1         | 1         | 0         | 0         | 1         | 0         | 0         |
| GUYOT                 | 0               | 0       | 0       | 2        | 12        | 26        | 25        | 7         | 2         | 0         | 0         | 0         | 0         | 0         |
| CONICAL SEAMOUNT      | 0               | 2       | 1       | 2        | 6         | 9         | 9         | 3         | 2         | 6         | 0         | 0         | 0         | 0         |
| RIDGE SEAMOUNT        | 0               | 2       | 3       | 2        | 3         | 3         | 10        | 4         | 3         | 0         | 1         | 1         | 0         | 0         |
| INACTIVE VENT         | 0               | 0       | 0       | 0        | 0         | 0         | 1         | 2         | 0         | 1         | 0         | 0         | 0         | 0         |
| VENT                  | 1               | 3       | 1       | 2        | 1         | 0         | 0         | 0         | 1         | 1         | 1         | 0         | 0         | 0         |
| ABYSSAL               | 0               | 0       | 0       | 0        | 0         | 0         | 0         | 0         | 0         | 1         | 3         | 3         | 1         | 4         |

**Supplemental Table 5:** CAPSTONE ROV dive effort shown by region and feature, categorized by each depth bin, showing effort by estimated area imaged (m<sup>2</sup>).

| REGION                | Estimated Area Imaged (m <sup>2</sup> ) |         |         |          |           |           |           |           |           |           |           |           |           |           |
|-----------------------|-----------------------------------------|---------|---------|----------|-----------|-----------|-----------|-----------|-----------|-----------|-----------|-----------|-----------|-----------|
|                       | 0- 250                                  | 250-500 | 500-750 | 750-1000 | 1000-1500 | 1500-2000 | 2000-2500 | 2500-3000 | 3000-3500 | 3500-4000 | 4000-4500 | 4500-5000 | 5000-5500 | 5500-6000 |
| HAWAII                | 0                                       | 119,250 | 31,000  | 19,500   | 164,250   | 328,250   | 389,875   | 120,500   | 39,000    | 21,500    | 37,750    | 0         | 0         | 0         |
| MARIANAS              | 12,750                                  | 197,500 | 42,000  | 27,750   | 20,250    | 86,250    | 48,000    | 50,250    | 53,000    | 66,750    | 34,000    | 30,750    | 1,000     | 31,000    |
| WESTERN PACIFIC       | 0                                       | 13,750  | 11,250  | 11,250   | 50,500    | 28,750    | 56,000    | 18,250    | 4,250     | 0         | 0         | 0         | 0         | 0         |
| AMERICAN SAMOA        | 0                                       | 34,750  | 30,500  | 6,500    | 8,250     | 8,500     | 18,500    | 12,500    | 8,000     | 13,750    | 0         | 0         | 0         | 0         |
| SOUTH CENTRAL PACIFIC | 250                                     | 55,250  | 29,250  | 33,750   | 71,750    | 86,250    | 69,500    | 0         | 0         | 0         | 5,750     | 5,500     | 0         | 8,500     |
| FEATURE               |                                         |         |         |          |           |           |           |           |           |           |           |           |           |           |
| ISLAND                | 4,500                                   | 201,500 | 38,250  | 5,500    | 2,000     | 12,250    | 19,500    | 0         | 0         | 0         | 9,250     | 0         | 0         | 0         |
| ATOLL                 | 0                                       | 59,000  | 29,250  | 20,250   | 41,500    | 8,500     | 16,000    | 14,000    | 0         | 0         | 0         | 0         | 0         | 0         |
| BANK                  | 2,750                                   | 77,500  | 28,500  | 0        | 39,000    | 107,000   | 56,000    | 17,500    | 8,500     | 0         | 8,250     | 0         | 0         | 0         |
| GUYOT                 | 0                                       | 0       | 0       | 12,000   | 106,750   | 289,500   | 269,625   | 56,250    | 21,250    | 0         | 0         | 0         | 0         | 0         |
| CONICAL SEAMOUNT      | 250                                     | 27,500  | 15,000  | 10,750   | 81,250    | 97,250    | 82,750    | 22,000    | 33,000    | 71,000    | 0         | 0         | 0         | 0         |
| RIDGE                 | 0                                       | 21,250  | 12,750  | 22,500   | 24,250    | 23,500    | 125,250   | 49,750    | 29,250    | 0         | 5,750     | 5,500     | 0         | 0         |
| SEAMOUNT              |                                         |         |         |          |           |           |           |           |           |           |           |           |           |           |
| INACTIVE VENT         | 0                                       | 0       | 0       | 0        | 0         | 0         | 12,750    | 42,000    | 0         | 23,500    | 0         | 0         | 0         | 0         |
| VENT                  | 6,500                                   | 33,250  | 19,750  | 27,750   | 20,250    | 0         | 0         | 0         | 12,250    | 5,250     | 11,750    | 0         | 0         | 0         |
| ABYSSAL               | 0                                       | 0       | 0       | 0        | 0         | 0         | 0         | 0         | 0         | 2,250     | 42,500    | 30,750    | 1,000     | 39,500    |

**Supplemental Table 6:** Top ten most abundant families by region

| Western Pacific  |         |                       | South Central Pacific |         |                       | Marianas Islands |         |                       | Hawaiian Islands |         |                       | American Samoa   |         |                       |
|------------------|---------|-----------------------|-----------------------|---------|-----------------------|------------------|---------|-----------------------|------------------|---------|-----------------------|------------------|---------|-----------------------|
| Family           | Total # | % of total for region | Family                | Total # | % of total for region | Family           | Total # | % of total for region | Family           | Total # | % of total for region | Family           | Total # | % of total for region |
| Primnoidae       | 4353    | 21.06%                | Primnoidae            | 6367    | 17.59%                | Cynoglossidae    | 10215   | 17.05%                | Isididae         | 33672   | 19.81%                | Dendrophylliidae | 5508    | 39.30%                |
| Sclerophyllidae  | 3527    | 17.06%                | Plexauridae           | 5758    | 15.90%                | Stylasteridae    | 8592    | 14.34%                | Chrysogorgiidae  | 26351   | 15.50%                | Antipathidae     | 3655    | 26.08%                |
| Acanthogorgiidae | 2273    | 11.00%                | Euryalidae            | 3398    | 9.39%                 | Dendrophylliidae | 6192    | 10.33%                | Coralliidae      | 19997   | 11.77%                | Nephtidae        | 1660    | 11.85%                |
| Coralliidae      | 2103    | 10.17%                | Chrysogorgiidae       | 2426    | 6.70%                 | Chrysogorgiidae  | 3373    | 5.63%                 | Primnoidae       | 16989   | 10.00%                | Chrysogorgiidae  | 642     | 4.58%                 |
| Chrysogorgiidae  | 1098    | 5.31%                 | Euplectellidae        | 2022    | 5.59%                 | Isididae         | 3368    | 5.62%                 | Alcyoniidae      | 6011    | 3.54%                 | Schizopathidae   | 293     | 2.09%                 |
| Cladopathidae    | 1021    | 4.94%                 | Isididae              | 1890    | 5.22%                 | Parisidae        | 2914    | 4.86%                 | Pheronematidae   | 5221    | 3.07%                 | Euplectellidae   | 272     | 1.94%                 |
| Stylasteridae    | 975     | 4.72%                 | Poecilasmaidae        | 1184    | 3.27%                 | Plexauridae      | 2483    | 4.14%                 | Acanthogorgiidae | 4609    | 2.71%                 | Epigonidae       | 181     | 1.29%                 |
| Isididae         | 849     | 4.11%                 | Ophiacanthidae        | 1069    | 2.95%                 | Primnoidae       | 2296    | 3.83%                 | Schizopathidae   | 4471    | 2.63%                 | Amphianthidae    | 157     | 1.12%                 |
| Uncinateridae    | 505     | 2.44%                 | Coralliidae           | 1000    | 2.76%                 | Gorgoniidae      | 2250    | 3.76%                 | Euplectellidae   | 4449    | 2.62%                 | Isididae         | 137     | 0.98%                 |
| Schizopathidae   | 454     | 2.20%                 | Antipathidae          | 900     | 2.49%                 | Vulcanellidae    | 2214    | 3.69%                 | Euryalidae       | 4164    | 2.45%                 | Myxillidae       | 104     | 0.74%                 |

**Supplementary Figure 1.** CAPSTONE ROV dive sites organized by region (Marianas, Western Pacific, Hawaiian Islands, South-Central Pacific, American Samoa). Marine Protected Areas boundaries are indicated by polygons. Dive site markers are color coded by feature type.

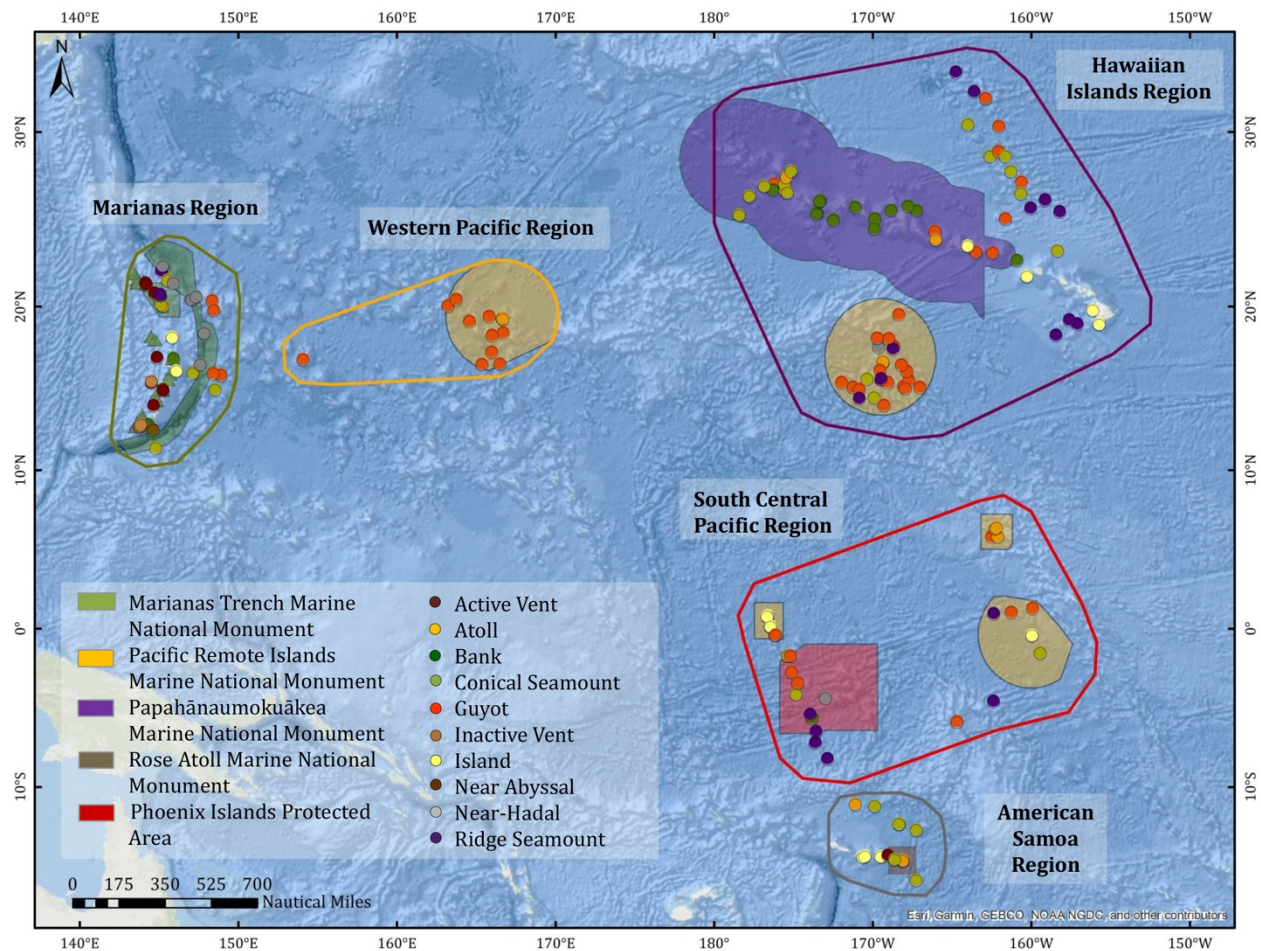

Supplement: Supplementary file 1 [file 21746940]
